# Supplementary material for: Regulation of the Epithelial Na+ Channel by the Protein Kinase CK2
Source: PubMed Central journal article supplement — J Biol Chem. 2008 May 9;283(19):13225–32. doi: 10.1074/jbc.M704532200 (PMC3259572; doi:10.1074/jbc.m704532200), 2008-05-09
Supplement: M704532200_1.pdf [file M704532200_1.pdf]

## Supplement 1: Inhibition of mCK2 and mNedd4-2 by RNAi

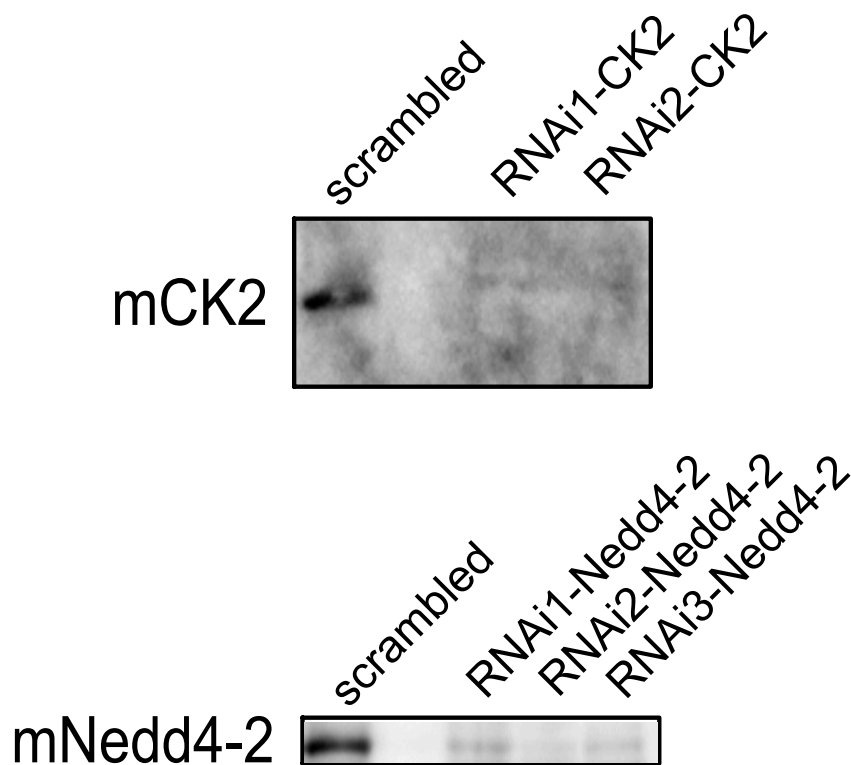

Mouse collecting duct (M1) cells were transfected with RNAi for CK2 or Nedd4-2 or were treated with scrambled DNA (each 1  $\mu$ g) for 7 hours. Cells were harvested 72 h after siRNA treatment and subjected to Western blot analysis. Equal amounts of lysates (40  $\mu$ g) were loaded on a gel and after transfer to a PE membrane probed with CK2 and Nedd4-2 antibodies, respectively.
